# Supplementary material for: The Foot’s Arch and the Energetics of Human Locomotion
Source: PubMed Central journal article supplement (PMC4726102; doi:10.1038/srep19403), 2016-01-19
Supplement: srep19403-s1.pdf [file srep19403-s1.pdf]

## The Foot's Arch and the Energetics of Human Locomotion

Sarah M. Stearne<sup>1</sup>, Kirsty A. McDonald<sup>1</sup>, Jacqueline A. Alderson<sup>1</sup>, Ian North<sup>2</sup>, Charles E. Oxnard<sup>3</sup> &

\*Jonas Rubenson<sup>1,4</sup>

<sup>1</sup> School of Sport Science, Exercise and Health, The University of Western Australia, Perth, WA, 6009, Australia

<sup>2</sup> Willetton Podiatry, Willetton, WA, 6155, Australia

<sup>3</sup> Anatomy, Physiology and Human Biology, The University of Western Australia, Perth, WA, 6009, Australia

<sup>4</sup> Biomechanics Laboratory, Department of Kinesiology, The Pennsylvania State University, University Park, PA, 16803, USA

## 2 Online Supplementary Material

### 4 Additional Methodology

#### *Insole Material Testing*

6 To assess the energy storage/return of the insoles themselves during running the material properties  
of the insoles were tested using an Instron material testing machine with a custom testing mount  
8 (Instron Model 8874, Illinois Tool Works Inc.) and Instron Dynamic Software (Wave Matrix Version  
1.2). A custom Acetal plastic testing mount (diameter 50 mm) that conformed to the slope and curve  
10 of the insole arch (point of max height) was designed. Force was applied to the insoles in a manner  
that replicated measured RFS and FFS stance time and stride frequency <sup>1</sup>. The Instron was  
12 programmed to displace the insoles four millimeters during running for 100 cycles and the resultant  
load displacement was recorded allowing measurement of the insole stiffness and energy  
14 storage/return (Supplementary Figure S1). The value of compression was chosen to encompass the  
maximum insole compression measured during pilot testing of 2.7 ms<sup>-1</sup> running (measured with a  
16 high speed camera). For a video of the insole material testing please see additional Online  
Supplementary Material.

18 **Supplementary Video S1.** High-speed video (300 frames s<sup>-1</sup>) of the insole material testing. The  
material testing rig (Instron Model 8874, Illinois Tool Works Inc.) was configured to compress the  
20 insole 4mm during a simulated running foot contact).

#### 22 *Foot Model and Arch Compression Estimates*

Because the markers placed on the first and fifth metatarsal bases were elevated from the foot, we  
24 used static pointer trials to identify the anatomical medial and lateral aspects of these landmarks,  
expressed in the rearfoot anatomical coordinate system. The midpoint of these virtual landmarks  
26 was used to define both a rearfoot-forefoot joint center (metatarsophalangeal (MTP) joint center) as  
well as the base of the foot (Manuscript Figure 3). A forefoot segment was created using the virtual  
28 metatarsal markers and a third virtual hallux marker, defined using a static pointer trial (these virtual  
landmarks were expressed relative to a coordinate system defined by the metatarsal and hallux

30 markers). A foot sole plane was created by transposing the rearfoot coordinate system so that its  
origin was the rearfoot-forefoot joint center (the x-z-plane of this coordinate system is oriented  
32 parallel with the ground in a neutral standing posture). A continuous trace of the vertical  
displacement of the navicular marker relative to the new rearfoot coordinate system in the y-axis  
34 was used as a measure of arch compression (Supplementary Figure S2). This method minimized any  
effects that ankle inversion/eversion has on predicting arch compression since these motions do not  
36 alter the location of the navicular marker in the rearfoot coordinate system. The model also allowed  
us to compute the inversion/eversion angle, which was found to be unaffected by the insole  
38 (Supplementary Figure S3). The navicular height relative to the sole of the foot (x-z-plane of the  
rear-foot coordinate system) at initial foot contact in the shod only condition was used as a  
40 reference value to standardize arch compression. Results were compared to digitized high speed  
video footage (navicular marker relative to top of the shoe midsole); maximal navicular compression  
42 from the two methods correlated strongly ( $r = 0.88$ ).

44 Sagittal plane joint angles and net moments of the forefoot segment were calculated about the MTP  
joint center using Vicon BodyBuilder software (Oxford Metrics, Oxford, UK). The ground reaction  
46 force (GRF) was ascribed to the forefoot segment when the center of pressure was anterior to the  
MTP joint center and to the rearfoot when it was distal. Inverse dynamic calculations of the forefoot  
48 segment assumed that the moments generated by the mass and inertia of the segment were  
negligible as per Stefanyshyn and Nigg<sup>2</sup>.

50

#### *Arch Elastic Energy and Total Limb Mechanical Work of Locomotion Estimates*

52 First, the maximal experimental ankle compressive load during stance was estimated by summing  
the computed joint reaction force with an estimate of the Achilles tendon force (the trial with the  
54 highest value was used). Achilles tendon force was estimated by dividing the net ankle joint moment  
by the Achilles tendon moment arm taken from calliper measurements during standing. The

56 participant's peak arch strain energy was then predicted from the estimated compressive ankle load  
using the strain energy versus ankle load relationship from Ker et al. <sup>3</sup> (their Figure 2B was digitized  
58 and used to develop the strain energy equation  $(J) = 0.269x^2 + 1.004x$ ; where  $x$  = ankle compressive  
load (kN)). We subsequently developed subject specific arch load-displacement curves (see  
60 Manuscript Figure 4) using two fixed points, (0,0) and (max load, max arch compression), and varied  
a third point so that the area under the line of best fit (power function) for the three load-  
62 displacement points matched the energy storage predicted from the above strain energy equation  
(power function;  $F_{comp} = y_0 + Ax^{pow}$ , where  $F_{comp}$  is the compressive force (kN),  $y_0$  is the y-intercept  
64 (0),  $x$  is arch compression (mm) and  $A$  is a constant). The optimization procedure was performed  
using a root solver algorithm in MATLAB (fsolve; The MathWorks, Natick, MA). The subject-specific  
66 arch load-displacement curve was subsequently used to estimate the elastic energy stored under  
other amounts of arch compression in the remaining walking/running trials by integrating the area  
68 under the arch load vs displacement curve for the specified arch compression. The amount of energy  
returned to the runner from the estimated stored arch elastic energy ( $W_{arch}^+$ ) was calculated using a  
70 hysteresis of 22%, based on data from Ker et al. <sup>3</sup>. The  $W_{arch}^+$  was expressed in  $J\ kg^{-1}\ m^{-1}$  by  
multiplying the returned energy from the left foot by two (assuming symmetry) and dividing by the  
72 average distance traveled per stride and body mass.

74 The positive mechanical work during a single step ( $W_{limb,step}^+$ ) was calculated for walking, level  
running and incline running using the individual limb work force plate approach described by  
76 Donelan et al. <sup>4</sup>. Limb powers for the right and left limbs ( $P_r, P_l$ ) were calculated (from right heel strike  
to left heel strike) as the dot product of the ground reaction force acting on the right and left limbs  
78 ( $F_r, F_l$ ), respectively, and the velocity of the center of mass ( $v_{COM}$ ) (Eq. S1). The right and left limb  
ground reaction forces were recorded from independent force plates under the right and left  
80 treadmill belts.

$$P_r = \vec{F}_r \cdot \vec{v}_{COM} = F_{z_r} v_{z,COM} + F_{y_r} v_{y,COM} + F_{x_r} v_{x,COM} \quad (\text{Eq. S1})$$

$$P_l = \vec{F}_l \cdot \vec{v}_{COM} = F_{z_l} v_{z,COM} + F_{y_l} v_{y,COM} + F_{x_l} v_{x,COM}$$

82

Centre of mass (COM) velocities (vertical, z; fore-aft, y; medio-lateral, x) were initially calculated by

84 time-integrating the COM accelerations, determined from the sum of the right and left limb GRF's

(Eq. S2) (see Donelan <sup>4</sup>).

86

$$v_{z,COM} = \int \frac{F_{z_r} + F_{z_l} - mg}{m} dt \quad (\text{Eq. S2})$$

$$v_{y,COM} = \int \frac{F_{y_r} + F_{y_l}}{m} dt$$

$$v_{x,COM} = \int \frac{F_{x_r} + F_{x_l}}{m} dt$$

88

where  $m$  is body mass and  $g$  is acceleration due to gravity ( $9.81 \text{ m s}^{-1}$ ). During a single running step

90 the GRF from the trailing limb (designated to be the left limb) equaled zero. Integration constants

(offsets) were applied to the calculated COM velocities: z was set so that the average COM vertical

92 velocity over one step equaled 0; y was set so that the average fore-aft velocity over one step

equaled the treadmill speed; x was set so that the medio-lateral velocity at the start and end of the

94 step were equal but opposite. Offsets were adjusted during the incline condition: z; treadmill speed

$x \sin 3^\circ$ , y; treadmill speed  $x \cos 3^\circ$ . Limb powers were restricted to positive values and integrated

96 with respect to time ( $t_i$  and  $t_f$  represent the right heel strike and left heel strike respectively) to

determine the positive mechanical work performed in the limbs over one step (Eq. S3).

98

$$W_{right}^+ = \int_{t_i}^{t_f} P_r dt, \text{ for } P_r > 0 \quad (\text{Eq. S3})$$

$$100 \quad W_{left}^+ = \int_{t_i}^{t_f} P_l dt, \text{ for } P_l > 0$$

where  $W_{right}^+$  and  $W_{left}^+$  represent the positive mechanical work of the right and left limb,  
 102 respectively. To compute the total positive mechanical work during the step ( $W_{limb,step}^+$ ) in walking,  
 $W_{right}^+$  and  $W_{left}^+$  were summed as per the individual limbs methods described by Donelan et al. <sup>4</sup>.  
 104 In running, the left (trailing) limb generated no ground reaction force as it was in swing-phase and  
 thus  $W_{limb,step}^+$  was taken as  $W_{right}^+$ . The mechanical cost of transport ( $W_{limb}^+$ ; J kg<sup>-1</sup> m<sup>-1</sup>) was  
 106 computed by multiplying  $W_{limb,step}^+$  by two (assuming bilateral limb symmetry) and dividing by the  
 average distance traveled per stride and body mass.

108

#### *Locomotor Mechanical Efficiency and Modelled Metabolic Energy Prediction*

110 In addition to predicting increase in metabolic cost using a constant efficiency of 25%, we also  
 predicted costs using a computed mechanical locomotor efficiency ( $\eta_{loc}^+$ ). This was done by using  
 112 the experimental gross energy cost ( $E_{tot}$ ; J kg<sup>-1</sup> m<sup>-1</sup>) and the positive limb mechanical work  
 ( $W_{limb}^+$ ; J kg<sup>-1</sup> m<sup>-1</sup>) of the minimal shoe-only conditions:

114

$$\eta_{loc}^+ = W_{limb}^+ / E_{tot} \quad (\text{Eq. S4})$$

116

We subsequently computed a predicted increase in locomotor metabolic cost associated with  
 118 restricting arch compression for each condition as:

$$E_{arch} = (\Delta W_{arch}^+ - \Delta W_{limb}^+) / \eta_{loc}^+ \quad (\text{Eq. S5})$$

122 where  $\Delta W_{arch}^+$  and  $\Delta W_{limb}^+$  are the differences in the amount of returned arch elastic energy and  
 positive limb mechanical work between the minimal shoe-only trial and the corresponding insole  
 124 trial for level running, incline running and walking, respectively.

126 *Maximal Oxygen Consumption and Lactate Threshold*

In a separate session prior to the biomechanics testing, participant's maximum oxygen uptake  
128 ( $\dot{V}O_{2max}$ ) and lactate threshold were determined by an incremental exercise test. In the 24 hours  
prior to attending the laboratory, participants were asked not to exercise heavily or consume  
130 caffeinated food or beverages. In the two hours prior participant were instructed not to consume  
any food or drink other than water. Before commencement of the test, a baseline heart rate (Polar  
132 F1 Heart Rate Monitor, Kempele, Finland) and fingertip capillary blood sample (Lactate-Pro, Arkray,  
LT-1710, Kyoto, Japan) were collected. Participants were allowed to warm up at a self-selected pace  
134 and familiarize themselves with the motorized treadmill (VR 3000, NuryTech Inc, Germany) and  
mouth piece.

136

A three minute exercise and one minute rest protocol was followed until volitional exhaustion. Given  
138 the weekly running distance inclusion criteria of the study, it was assumed that all participants were  
of a good fitness level so all  $\dot{V}O_{2max}$  tests commenced at a standard 10 km/hr. The treadmill belt  
140 speed was increased by 2 km/hr after each exercise bout until 16 km/hr after which speed was  
increased by 1 km/hr. During the rest minute participants straddled the treadmill belt while a  
142 fingertip blood sample was collected and heart rate recorded. Throughout the test, expired gasses  
were collected by a two-valve mouthpiece connected via two lightweight flexible tubes to a  
144 computerized oxygen and carbon dioxide gas analysis system [oxygen and carbon dioxide analysers  
(Ametek SOV S-3A11 / Ametek COV CD-3A, Applied Electrochemistry, Ametek, Pittsburgh, PA)].  
146 Ventilation was recorded at 15 second intervals using a turbine ventilometer (225A; Morgan,  
Chatham Kent, UK). The ventilometer and gas analysers were calibrated before and immediately  
148 after each test using a one litre syringe pump and reference gas mixtures, respectively (BOC Gases,  
Chatswood, Australia). Participant's peak oxygen consumption was determined by summing the  
150 four highest consecutive 15 second  $VO_2$  values. The lactate threshold was determined using a Dmax  
method<sup>5</sup>.

152 *Additional Statistical Analysis*

A series of Wilcoxon's Signed Rank Tests (non-parametric) were used to assess statistical differences  
154 between RPE and questionnaire results during walking, level running and incline running conditions.

156 **Additional Results**

*Temporal Parameters*

158 The insoles had no effect on any temporal parameters (stance, swing or stride time). Foot strike  
technique significantly affected stance time ( $p = 0.014$ ) in level running and on both stance  
160 ( $p = 0.019$ ) and swing time ( $p = 0.040$ ) in incline running. RFS runners spent longer in the stance  
phase in both conditions and a shorter time in the swing phase during the incline condition  
162 compared with FFS runners. See Table S1 for additional temporal parameter data.

164 *Incremental Exercise Test*

The incremental exercise test identified that participant's lactate threshold was  $6.1 \pm 1.1$  mmol/L  
166 which occurred at a speed of  $4.5 \pm 0.3$  ms<sup>-1</sup>. Given that the energy expenditure and lactate  
concentrations when running at  $2.7$  ms<sup>-1</sup> on both the level and incline were lower than that at which  
168 the lactate threshold occurred, (lactate concentrations; incline running shoe-only  $2.5 \pm 1.0$  mmol/L,  
incline running FAI  $2.5 \pm 1.2$  mmol/L), it was concluded that all participants were exercising  
170 aerobically. The blood lactate concentration of one participant during the incline trial exceeded his  
previously determined threshold. His incline and level running data were therefore removed from  
172 the analyses.

174 *Insole Material Testing*

Material testing on the insoles returned less than 0.4 Joules of energy during running (Figure S1).  
176 This value is equal to less than 3% of the elastic energy storage/return that was estimated to be lost  
when wearing the insoles.



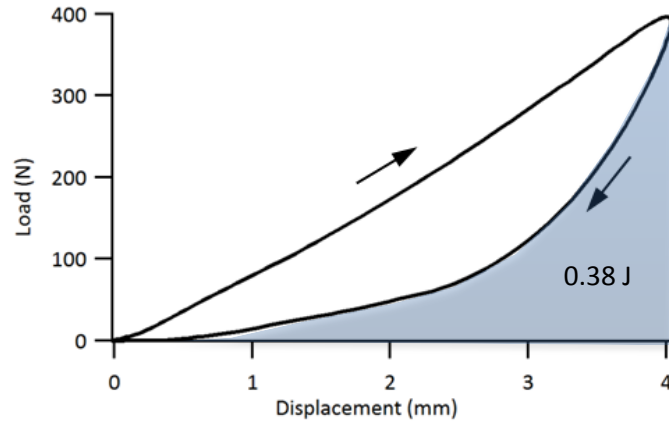

178 **Supplementary Figure S1.** Average insole load-displacement curve indicating minimal energy return  
 180 from the insoles.

182 *Arch Kinematics*

184 A representative trace of arch compression over the stance phase of level running for one  
 participant is presented in Figure S2. Peak arch compression was significantly reduced in the HAI and  
 186 FAI conditions compared to the minimal shoe-only (both  $p < 0.001$ ; Figure S2). No statistically  
 significant difference in peak ankle inversion or eversion was identified between the minimal shoe-  
 188 only and FAI level running conditions (Figure S3).

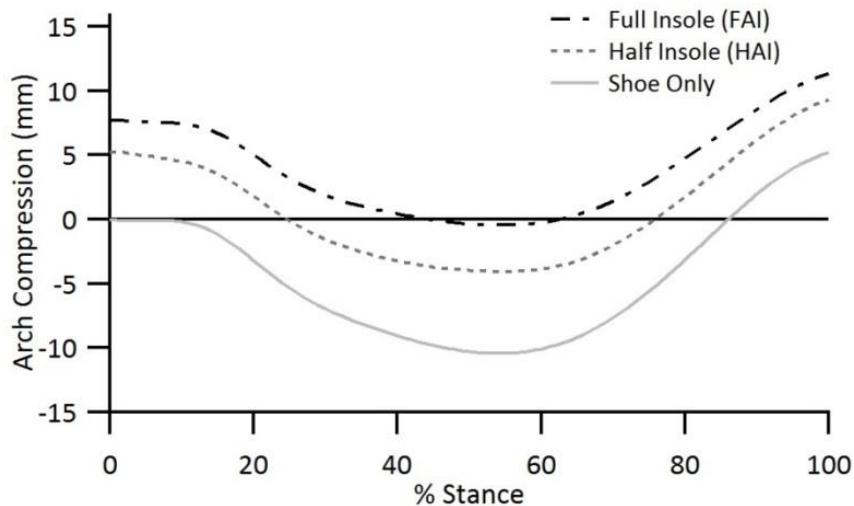

190 **Supplementary Figure S2.** Representative arch compression (mm) data when running in the minimal  
 shoe only (solid light grey line), half arch insole (HAI; grey dashed line) and full arch insole (FAI;  
 192 black dashed line) throughout the stance phase in level running. Zero arch compression indicates arch  
 height at initial foot contact in the minimal shoe-only condition. Positive values indicate a slackened  
 194 state of the arch elastic structures compared to the initial foot contact in the minimal shoe only  
 condition and negative values indicate stretch compared to the minimal shoe only initial foot  
 196 contact.

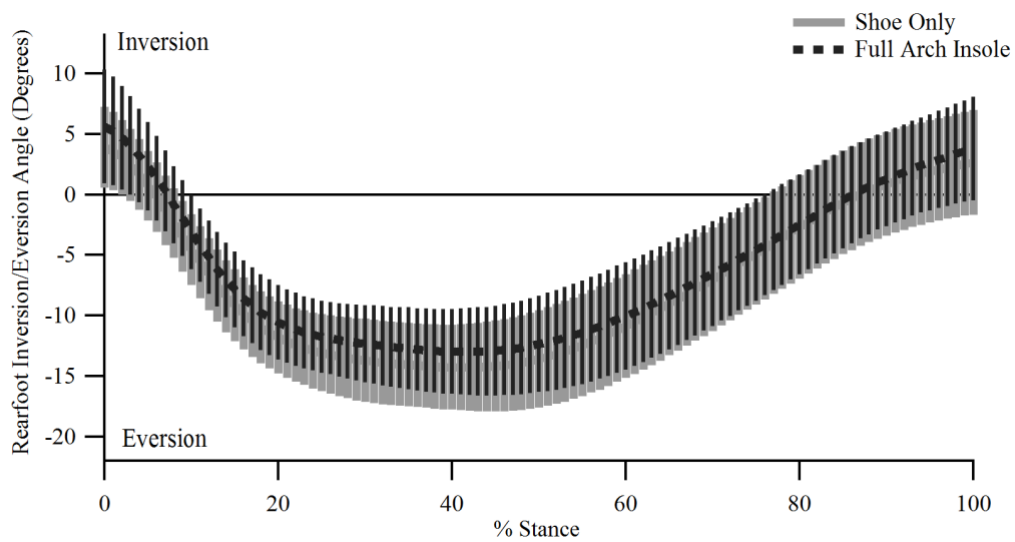

198

**Supplementary Figure S3.** Average rearfoot inversion/eversion angle ( $\pm$  S.D.) across the stance phase of level running (from foot contact to toe off) during the shoe only (grey) and Full Arch Insole (FAI; black) conditions. No statistically significant ( $p < 0.05$ ) difference was observed between initial, peak, or terminal stance eversion angles.

204

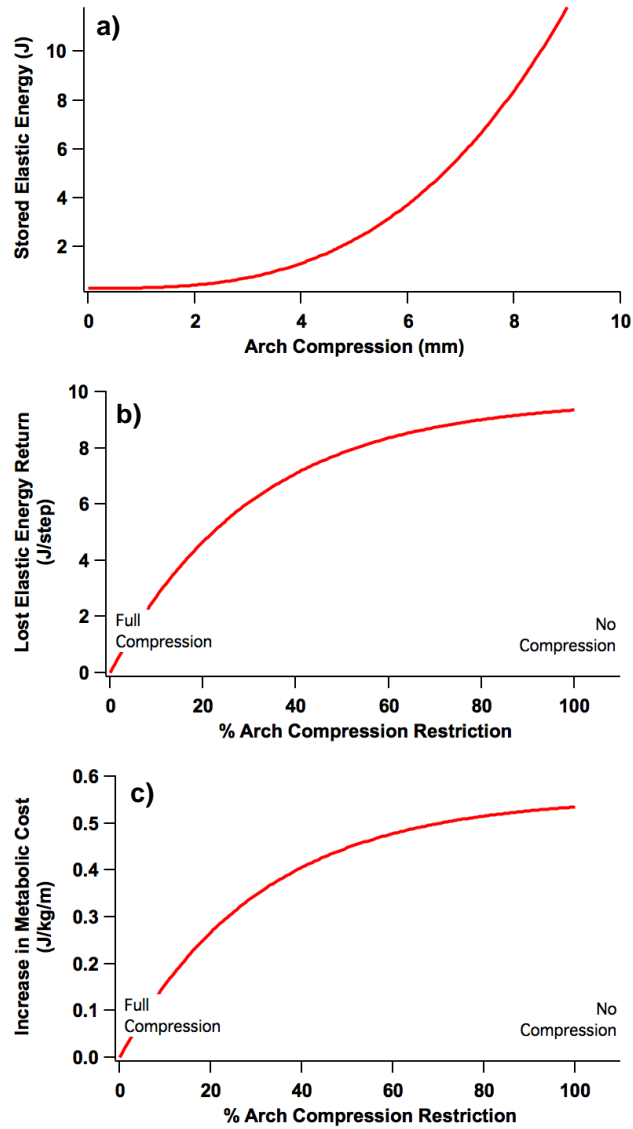

206

208 **Supplementary Figure S4.** Typical participant arch mechanics and energetics predicted from our  
 210 model, indicating; **a)** the stored elastic energy vs arch compression, **b)** the predicted energy lost in  
 212 the arch spring as a function of the % arch compression restriction and **c)** the predicted increase in  
 the metabolic energy cost of running ( $\text{J kg}^{-1} \text{m}^{-1}$ ; level running at  $2.7 \text{ ms}^{-1}$ ) as a function of the % arch  
 compression restriction.

212

214

216

218 **Supplementary Table S1.** Temporal parameters during walking, level running and incline running  
 220 across shoe only, half arch insole (HAI) and full arch insole (FAI) in rearfoot strike (RFS) and forefoot  
 224 strike (FFS) groups.

|                                   |                          | walk           |                |                | level run                      |                |                | incline run                    |                                |                |
|-----------------------------------|--------------------------|----------------|----------------|----------------|--------------------------------|----------------|----------------|--------------------------------|--------------------------------|----------------|
|                                   |                          | stance<br>time | swing<br>time  | stride<br>time | stance<br>time                 | swing<br>time  | stride<br>time | stance<br>time                 | swing<br>time                  | stride<br>time |
| main Effect                       | insole                   | 0.142          | 0.896          | 0.151          | 0.551                          | 0.126          | 0.197          | 0.650                          | 0.797                          | 0.374          |
| <i>p</i> value                    | foot strike              | 0.144          | 0.427          | 0.624          | <b>0.014</b> <sup>†</sup>      | 0.079          | 0.512          | <b>0.019</b> <sup>†</sup>      | <b>0.040</b> <sup>†</sup>      | 0.798          |
| <b>shoe only</b>                  | rearfoot<br>strike (RFS) | 0.77<br>± 0.03 | 0.45<br>± 0.02 | 1.22<br>± 0.05 | <b>0.30</b><br>± <b>0.03</b> * | 0.44<br>± 0.05 | 0.74<br>± 0.05 | <b>0.31</b><br>± <b>0.04</b> * | <b>0.43</b><br>± <b>0.06</b> * | 0.73<br>± 0.05 |
|                                   | forefoot<br>strike (FFS) | 0.74<br>± 0.03 | 0.45<br>± 0.02 | 1.19<br>± 0.05 | <b>0.28</b><br>± <b>0.03</b> * | 0.46<br>± 0.05 | 0.73<br>± 0.05 | <b>0.26</b><br>± <b>0.01</b> * | <b>0.48</b><br>± <b>0.05</b> * | 0.74<br>± 0.05 |
| <b>half arch<br/>insole (HAI)</b> | rearfoot<br>strike (RFS) |                |                |                | <b>0.30</b><br>± <b>0.03</b> * | 0.43<br>± 0.05 | 0.73<br>± 0.05 |                                |                                |                |
|                                   | forefoot<br>strike (FFS) |                |                |                | <b>0.26</b><br>± <b>0.01</b> * | 0.49<br>± 0.06 | 0.75<br>± 0.06 |                                |                                |                |
| <b>full arch<br/>insole (FAI)</b> | rearfoot<br>strike (RFS) | 0.78<br>± 0.04 | 0.45<br>± 0.04 | 1.23<br>± 0.07 | <b>0.30</b><br>± <b>0.03</b> * | 0.44<br>± 0.05 | 0.74<br>± 0.05 | <b>0.29</b><br>± <b>0.03</b> * | <b>0.44</b><br>± <b>0.05</b> * | 0.73<br>± 0.04 |
|                                   | forefoot<br>strike (FFS) | 0.76<br>± 0.04 | 0.44<br>± 0.02 | 1.20<br>± 0.05 | <b>0.26</b><br>± <b>0.02</b> * | 0.47<br>± 0.07 | 0.73<br>± 0.07 | <b>0.27</b><br>± <b>0.02</b> * | <b>0.46</b><br>± <b>0.07</b> * | 0.74<br>± 0.06 |

(All times are in seconds. † indicates significant ANOVA main effect ( $p < 0.05$ ). Where a significant main effect was detected, t-tests were run to determine the location of the effect. \* indicates significant t-test difference ( $p < 0.05$ ) between habitual rearfoot strike (RFS) and habitual forefoot strike (FFS) runners within condition.)

226 **Supplementary Table S2.** Additional data on arch compression restriction during walking, level running and incline running by the Half (HAI; level run only) and Full Arch Insoles (FAI) and observed and modelled metabolic changes.

| Condition              | Habitual foot strike | % Arch compression restricted | Net $\dot{V}O_2$ (minus standing $\dot{V}O_2$ ) (ml kg <sup>-1</sup> min <sup>-1</sup> ) | Gross $\dot{V}O_2$ (ml kg <sup>-1</sup> min <sup>-1</sup> ) | Experimentally observed change in metabolic cost of transport (gross $\dot{V}O_2$ ) (J kg <sup>-1</sup> m <sup>-1</sup> ) | Experimentally observed % change in metabolic cost of transport (vs shoe-only) | Modelled change in metabolic cost of transport (25% efficiency) (J kg <sup>-1</sup> m <sup>-1</sup> ) | Modelled % change in metabolic cost of transport (25% efficiency) (vs shoe-only) | Calculated locomotor efficiency | Modelled change in metabolic cost of transport (calculated locomotor efficiency) (J kg <sup>-1</sup> m <sup>-1</sup> ) | Modelled % change in metabolic cost of transport (calculated locomotor efficiency) (vs shoe-only) |
|------------------------|----------------------|-------------------------------|------------------------------------------------------------------------------------------|-------------------------------------------------------------|---------------------------------------------------------------------------------------------------------------------------|--------------------------------------------------------------------------------|-------------------------------------------------------------------------------------------------------|----------------------------------------------------------------------------------|---------------------------------|------------------------------------------------------------------------------------------------------------------------|---------------------------------------------------------------------------------------------------|
| <b>WALK</b>            |                      |                               |                                                                                          |                                                             |                                                                                                                           |                                                                                |                                                                                                       |                                                                                  |                                 |                                                                                                                        |                                                                                                   |
| Minimal shoe-only      | RFS                  | n/a                           | 6.3 ± 1.2                                                                                | 13.0 ± 1.5                                                  | n/a                                                                                                                       | n/a                                                                            | n/a                                                                                                   | n/a                                                                              | 9.5 ± 1.4                       | n/a                                                                                                                    | n/a                                                                                               |
|                        | FFS                  | n/a                           | 6.6 ± 0.8                                                                                | 13.3 ± 1.1                                                  | n/a                                                                                                                       | n/a                                                                            | n/a                                                                                                   | n/a                                                                              | 10.5 ± 2.4                      | n/a                                                                                                                    | n/a                                                                                               |
|                        | Average              | n/a                           | 6.5 ± 1.0                                                                                | 13.2 ± 1.3                                                  | n/a                                                                                                                       | n/a                                                                            | n/a                                                                                                   | n/a                                                                              | 10.0 ± 2.0                      | n/a                                                                                                                    | n/a                                                                                               |
| Full Arch Insole (FAI) | RFS                  | 84.6 ± 22.4                   | 6.4 ± 1.1                                                                                | 13.1 ± 1.6                                                  | 0.04 ± 0.38                                                                                                               | 1.3 ± 10.3                                                                     | 0.22 ± 0.27                                                                                           | 5.7 ± 6.3                                                                        | n/a                             | 0.58 ± 0.75                                                                                                            | 14.5 ± 17.5                                                                                       |
|                        | FFS                  | 80.5 ± 21.1                   | 6.5 ± 0.6                                                                                | 13.2 ± 1.4                                                  | -0.01 ± 0.25                                                                                                              | -0.6 ± 6.3                                                                     | 0.03 ± 0.33                                                                                           | 0.6 ± 7.8                                                                        | n/a                             | 0.22 ± 0.96                                                                                                            | 4.8 ± 20.9                                                                                        |
|                        | Average              | <b>82.4 ± 21.1*</b>           | 6.5 ± 0.8                                                                                | 13.2 ± 1.5                                                  | 0.02 ± 0.31                                                                                                               | 0.3 ± 8.2                                                                      | 0.12 ± 0.31                                                                                           | 3.0 ± 7.4                                                                        | n/a                             | 0.39 ± 0.83                                                                                                            | 9.4 ± 19.4                                                                                        |
| <b>LEVEL RUN</b>       |                      |                               |                                                                                          |                                                             |                                                                                                                           |                                                                                |                                                                                                       |                                                                                  |                                 |                                                                                                                        |                                                                                                   |
| Minimal shoe-only      | RFS                  | n/a                           | 30.3 ± 2.7                                                                               | 37.0 ± 3.1                                                  | n/a                                                                                                                       | n/a                                                                            | n/a                                                                                                   | n/a                                                                              | 27.5 ± 3.4                      | n/a                                                                                                                    | n/a                                                                                               |
|                        | FFS                  | n/a                           | 29.4 ± 2.5                                                                               | 36.1 ± 2.7                                                  | n/a                                                                                                                       | n/a                                                                            | n/a                                                                                                   | n/a                                                                              | 30.3 ± 3.4                      | n/a                                                                                                                    | n/a                                                                                               |
|                        | Average              | n/a                           | 29.9 ± 2.5                                                                               | 36.5 ± 2.9                                                  | n/a                                                                                                                       | n/a                                                                            | n/a                                                                                                   | n/a                                                                              | 28.9 ± 3.6                      | n/a                                                                                                                    | n/a                                                                                               |
| Half Arch Insole (HAI) | RFS                  | 63.5 ± 33.0                   | 31.9 ± 2.7                                                                               | 38.6 ± 3.1                                                  | 0.20 ± 0.20                                                                                                               | 4.5 ± 4.6                                                                      | 0.20 ± 0.18                                                                                           | 4.5 ± 4.0                                                                        | n/a                             | 0.18 ± 0.17                                                                                                            | 4.0 ± 3.6                                                                                         |
|                        | FFS                  | 59.3 ± 35.8                   | 31.0 ± 3.3                                                                               | 37.8 ± 3.4                                                  | 0.20 ± 0.26                                                                                                               | 4.5 ± 5.8                                                                      | 0.45 ± 0.31                                                                                           | 10.0 ± 6.9                                                                       | n/a                             | 0.39 ± 0.30                                                                                                            | 8.6 ± 6.4                                                                                         |
|                        | Average              | <b>61.4 ± 33.3*</b>           | <b>31.5 ± 3.0*</b>                                                                       | <b>38.2 ± 3.2*</b>                                          | <b>0.20 ± 0.23*</b>                                                                                                       | <b>4.5 ± 5.0*</b>                                                              | <b>0.32 ± 0.28*</b>                                                                                   | <b>7.2 ± 6.1*</b>                                                                | n/a                             | <b>0.28 ± 0.26*</b>                                                                                                    | <b>6.3 ± 5.6*</b>                                                                                 |
| Full Arch Insole (FAI) | RFS                  | 84.7 ± 22.0                   | 32.6 ± 3.5                                                                               | 39.3 ± 4.0                                                  | 0.28 ± 0.23                                                                                                               | 6.2 ± 4.7                                                                      | 0.24 ± 0.30                                                                                           | 5.3 ± 6.2                                                                        | n/a                             | 0.21 ± 0.28                                                                                                            | 4.7 ± 5.9                                                                                         |
|                        | FFS                  | 73.0 ± 27.3                   | 31.5 ± 2.6                                                                               | 38.2 ± 2.8                                                  | 0.26 ± 0.17                                                                                                               | 5.9 ± 3.8                                                                      | 0.40 ± 0.34                                                                                           | 8.9 ± 7.8                                                                        | n/a                             | 0.34 ± 0.31                                                                                                            | 7.6 ± 7.0                                                                                         |
|                        | Average              | <b>78.9 ± 24.7*</b>           | <b>32.1 ± 3.1*</b>                                                                       | <b>38.7 ± 3.4*</b>                                          | <b>0.27 ± 0.20*</b>                                                                                                       | <b>6.0 ± 4.2*</b>                                                              | <b>0.32 ± 0.32*</b>                                                                                   | <b>7.1 ± 7.1*</b>                                                                | n/a                             | <b>0.28 ± 0.30*</b>                                                                                                    | <b>6.2 ± 6.4*</b>                                                                                 |
| <b>INCLINE RUN</b>     |                      |                               |                                                                                          |                                                             |                                                                                                                           |                                                                                |                                                                                                       |                                                                                  |                                 |                                                                                                                        |                                                                                                   |
| Minimal shoe-only      | RFS                  | n/a                           | 40.7 ± 2.7                                                                               | 47.4 ± 3.3                                                  | n/a                                                                                                                       | n/a                                                                            | n/a                                                                                                   | n/a                                                                              | 24.9 ± 3.4                      | n/a                                                                                                                    | n/a                                                                                               |
|                        | FFS                  | n/a                           | 38.9 ± 2.2                                                                               | 45.6 ± 2.1                                                  | n/a                                                                                                                       | n/a                                                                            | n/a                                                                                                   | n/a                                                                              | 27.5 ± 2.3                      | n/a                                                                                                                    | n/a                                                                                               |
|                        | Average              | n/a                           | 39.8 ± 2.6                                                                               | 46.5 ± 2.8                                                  | n/a                                                                                                                       | n/a                                                                            | n/a                                                                                                   | n/a                                                                              | 26.2 ± 3.1                      | n/a                                                                                                                    | n/a                                                                                               |
| Full Arch Insole (FAI) | RFS                  | 76.2 ± 33.2                   | 40.8 ± 2.8                                                                               | 47.5 ± 3.5                                                  | 0.01 ± 0.09                                                                                                               | 0.2 ± 1.5                                                                      | 0.16 ± 0.37                                                                                           | 2.8 ± 6.4                                                                        | n/a                             | 0.14 ± 0.35                                                                                                            | 2.5 ± 6.0                                                                                         |
|                        | FFS                  | 60.8 ± 27.6                   | 39.8 ± 2.7                                                                               | 46.6 ± 2.5                                                  | 0.12 ± 0.24                                                                                                               | 2.1 ± 4.2                                                                      | 0.28 ± 0.33                                                                                           | 5.1 ± 6.0                                                                        | n/a                             | 0.27 ± 0.33                                                                                                            | 4.9 ± 6.0                                                                                         |
|                        | Average              | <b>68.5 ± 30.6*</b>           | 40.3 ± 2.7                                                                               | 47.0 ± 3.0                                                  | 0.07 ± 0.18                                                                                                               | 1.2 ± 3.2                                                                      | <b>0.22 ± 0.34*</b>                                                                                   | <b>4.0 ± 6.1*</b>                                                                | n/a                             | <b>0.20 ± 0.33*</b>                                                                                                    | <b>3.7 ± 5.9*</b>                                                                                 |

228

230

Rearfoot strike (RFS), Forefoot strike (FFS), Average (average of RFS and FFS), Half Arch Insole (HAI), Full Arch Insole (FAI). All statistical analyses were conducted on raw data not percentages. ANOVAs revealed no main effect of foot strike. \* Significantly different from minimal shoe-only within the same condition  $p < 0.05$ .

**Supplementary Table S3.** Questionnaire results.

| Question                                                                    | Group          | Walk                   | Level Run              |                        | Incline Run            |
|-----------------------------------------------------------------------------|----------------|------------------------|------------------------|------------------------|------------------------|
|                                                                             |                | full arch insole (FAI) | half arch insole (HAI) | full arch insole (FAI) | full arch insole (FAI) |
| How painful did you find the insoles? 0 = No pain<br>10 = Extremely painful | RFS            | 1.4 ± 0.8              | 2.4 ± 1.8              | 2.1 ± 1.4              | 2.1 ± 1.3              |
|                                                                             | FFS            | 1.1 ± 1.1              | 1.7 ± 1.6              | 2.0 ± 1.3              | 2.6 ± 2.3              |
|                                                                             | <b>average</b> | 1.3 ± 0.9              | 2.1 ± 1.7              | 2.1 ± 1.3              | 2.4 ± 1.8              |
| Borg's Rating of Perceived Exertion                                         | RFS            | 6.9 ± 0.8              | 9.8 ± 2.0              | 9.9 ± 0.8              | 11.3 ± 1.4             |
|                                                                             | FFS            | 6.8 ± 1.2              | 10.6 ± 1.3             | 10.6 ± 1.3             | 12.0 ± 1.2             |
|                                                                             | <b>average</b> | 6.8 ± 1.0              | 10.1 ± 1.7             | 10.2 ± 1.4             | 11.6 ± 1.3             |
| Did the insoles cause you to alter your technique?<br>0 = No, 1 = Yes       | RFS            | 0.1 ± 0.4              | 0.0 ± 0.0              | 0.1 ± 0.3              | 0.0 ± 0.0              |
|                                                                             | FFS            | 0.0 ± 0.0              | 0.3 ± 0.5              | 0.3 ± 0.5              | 0.3 ± 0.5              |
|                                                                             | <b>average</b> | 0.1 ± 0.3              | 0.2 ± 0.4              | 0.2 ± 0.4              | 0.1 ± 0.3              |

232 No statistically significant results were identified. Rearfoot strike (RFS), Forefoot strike (FFS)

### 234 *Study Limitations*

The authors acknowledge that the study has a number of limitations. First, we were restricted to  
 236 assessing the effect of arch compression at a relatively slow running speed. It is predicted that the  
 energetic saving resulting from arch elastic energy storage and return is larger during faster level  
 238 running, and this might also be the case for incline running.

240 It is also important to note that the plantar fascia can undergo strain and energy storage due to  
 motion at the MTP joint independent of arch compression. In addition, restricting arch compression  
 242 may alter intrinsic foot muscle function, which Kelly et al. <sup>6,7</sup> have recently shown are capable of  
 controlling arch position and are active in running. Despite these possible factors, measurements of  
 244 MTP joint motion and net moments displayed minimal difference between the minimal shoe only  
 and FAI/HAI trials (unpublished data <sup>8</sup>), suggesting they may have had a small effect. Moreover,  
 246 intrinsic foot muscles likely contribute relatively little to the overall changes in energy cost given  
 their small size (~ 45g <sup>9</sup>).

248

A number of limitations also existed in estimating arch compression and elastic energy. A skin  
 250 mounted marker placed on the navicular tuberosity was used to determine arch compression. While

252 this is one of the most commonly used methods for assessing arch compression (e.g. <sup>6,10-12</sup>), it is not without errors and may have under-estimated bony midfoot motion <sup>13</sup>.

254 Our model of arch elastic energy storage/release depended on an estimate of arch compressive load from inverse dynamic calculations of ankle joint moments and Achilles tendon force that are both  
256 subject to error. The Achilles tendon moment arm was measured in a static standing position as the perpendicular distance from the mid-point of the lateral malleoli to the Achilles tendon <sup>14</sup>. While this  
258 measurement was performed by the same assessor it is understood that this method may differ from imaging-based measurements and does not represent the active moment arm of the Achilles  
260 during locomotion <sup>15</sup>. Furthermore, we assumed the hysteresis of the arch spring to be 22% based on the experimental data of Ker et al. <sup>3</sup>, although the actual hysteresis may differ between  
262 participants. Nevertheless, differences in the average hysteresis would only change the magnitude of the predicted elastic energy return (and the subsequent predicted energy cost of locomotion), but  
264 the relative differences between conditions would remain similar. Thus, although it serves as a simple estimation of energy storage in the arch, the modelled load-displacement curve may lead to  
266 errors in estimating arch elastic energy storage with a very high degree of accuracy.

268 Our modelled prediction of the metabolic effect of restricting arch compression and spring function depended on assumptions regarding the efficiency of performing positive locomotor mechanical  
270 work. We used an efficiency of 25%, which represents a value close to the theoretical maximal efficiency of muscle performing positive work <sup>16</sup>. These predictions therefore assume that the  
272 mechanical work performed to replace the lost elastic arch work is done by positive muscle fiber work, and that this additional muscle fiber work dictates the changes observed in metabolic cost.  
274 Although these assumptions are reasonable, it is important to note that the lost arch elastic work may have been substituted, to an extent, with an increase in elastic work performed at other joints.  
276 This would necessitate an increase in force in the muscle-tendon-units generating the elastic work,

which would exact a metabolic cost. In this case the increase in metabolic cost may not be dictated  
278 solely by increases in muscle fibers producing mechanical work at a constant efficiency. Therefore,  
as a secondary approach to predicting the increase in metabolic cost of locomotion arising from  
280 restricting arch compression we used a computed locomotor mechanical efficiency of performing  
the positive mechanical work in the minimal shoe-only conditions (Equations S4 and S5). This  
282 prediction does not necessitate that the additional metabolic energy expenditure is due strictly to  
additional muscle fiber work alone, but rather results from a proportional increase in the combined  
284 mechanical costs that dictate the locomotor efficiency in the level running, incline running or  
walking conditions (e.g. energy expended in isometric contractions, muscle fiber work, etc.).  
286 Modelled metabolic cost predictions from the locomotor mechanical efficiency showed the same  
overall findings as those using a constant efficiency of 25% (See Table S2). Finally, it is also possible  
288 that muscle fiber efficiency was different from the 25% used in this study. If average muscle fiber  
efficiency was different this would alter the magnitude of the predicted increases in metabolic  
290 energy cost, although the relative differences between conditions would be expected to remain  
similar.

292

We acknowledge the possibility that our observations reflect a more general effect of altering gait  
294 mechanics with an arch-restricting insole. However, notwithstanding the aforementioned  
limitations, there are several factors that lead the authors to dispute this interpretation. First, while  
296 the difference in arch compression was nearly two-fold between the FAI and HAI, both insoles  
resulted in a similar loss of arch elastic energy storage and exhibited a non-significant difference in  
298 metabolic cost (Figures 1 & 2 in the main article). These data suggest that the increase in metabolic  
cost of running while wearing the insoles is not simply a systematic effect of altering arch kinematics  
300 *per se*, but instead an effect of the non-linear arch elastic energy storage/return. Secondly, the fact  
that there was no change in energy cost during both the FAI incline running and walking conditions  
302 strengthens the interpretation that the energetic changes observed in level running are primarily



304 attributed to alterations in the arch spring mechanics. If other general modifications such as co-  
contraction, instability, intrinsic foot muscle activity <sup>7</sup>, cushioning <sup>17</sup> or discomfort <sup>18</sup> were the  
primary factors leading to the increase in metabolic cost after restricting arch compression, it would  
306 be expected that they would also elevate metabolic costs during incline running and possibly also  
during walking. Finally, peak ankle eversion during level running was unaffected by the insoles  
308 (Figure S3) and there were small differences in total limb mechanical work between the insole and  
minimal shoe only conditions (Table 1 main article).

310

#### Orthotic clause

312 The authors would like to note that the foot insoles used in this study do not represent conventional  
prescription practices by health practitioners for symptomatic individuals in a clinical setting, but  
314 rather a tool for experimentally testing our hypotheses.

#### 316 References

- 318 1 Stearne, S. M., Alderson, J. A., Green, B., Donnelly, C. J. & Rubenson, J. Joint kinetics in  
rearfoot versus forefoot running: Implications of switching technique. *Med Sci Sports Exerc*  
**46**, 1578–1587, doi:10.1249/MSS.0000000000000254 (2014).
- 320 2 Stefanyshyn, D. & Nigg, B. M. Mechanical energy contribution of the metatarsophalangeal  
joint to running and sprinting. *J Biomech* **30**, 1081-1085 (1997).
- 322 3 Ker, R. F., Bennett, M. B., Bibby, S. R., Kester, R. C. & Alexander, R. M. The spring in the arch  
of the human foot. *Nature* **325**, 147-149 (1987).
- 324 4 Donelan, M. J., Kram, R. & Kuo, A. D. Simultaneous positive and negative external  
mechanical work in human walking. *J Biomech* **35**, 117-124, doi:10.1016/S0021-  
326 9290(01)00169-5 (2002).
- 328 5 Cheng, B. *et al.* A new approach for the determination of ventilatory and lactate thresholds.  
*Int J Sports Med* **13**, 518-522, doi:10.1055/s-2007-1021309 (1992).
- 330 6 Kelly, L. A., Cresswell, A. G., Racinais, S., Whiteley, R. & Lichtwark, G. Intrinsic foot muscles  
have the capacity to control deformation of the longitudinal arch. *J R Soc Inter* **11**, 20131188,  
doi:10.1098/rsif.2013.1188 (2014).
- 332 7 Kelly, L. A., Lichtwark, G. A. & Cresswell, A. G. Active regulation of longitudinal arch  
compression and recoil during walking and running. *J R Soc Interface* **12**, 20141076,  
334 doi:10.1098/rsif.2014.1076 (2015).
- 336 8 McDonald, K. A. *The role of arch compression and metatarsophalangeal joint dynamics in  
modulating plantar fascia strain in running* (The University of Western Australia,  
UnPublished, 2014).
- 338 9 Kura, H., Luo, Z. P., Kitaoka, H. B. & An, K. N. Quantitative analysis of the intrinsic muscles of  
the foot. *The Anatomical record* **249**, 143-151 (1997).

340 10 Ferber, R. & Benson, B. Changes in multi-segment foot biomechanics with a heat-mouldable  
342 semi-custom foot orthotic device. *J Foot Ankle Res* **4**, 1-8, doi:10.1186/1757-1146-4-18  
(2011).

344 11 Perl, D., Daoud, A. & Lieberman, D. Effects of footwear and strike type on running economy.  
*Med Sci Sports Exerc* **44**, 1335–1343, doi:10.1249/MSS.0b013e318247989e (2012).

346 12 Boyer, E. R., Ward, E. D. & Derrick, T. R. Medial longitudinal arch mechanics before and after  
a 45-minute run. *J Am Podiatr Med Assoc* **104**, 349-356, doi:10.7547/0003-0538-104.4.349  
(2014).

348 13 Nester, C. *et al.* Foot kinematics during walking measured using bone and surface mounted  
markers. *J Biomech* **40**, 3412-3423, doi:org/10.1016/j.jbiomech.2007.05.019 (2007).

350 14 Lee, S. S. M. & Piazza, S. J. Inversion–eversion moment arms of gastrocnemius and tibialis  
anterior measured in vivo. *J Biomech* **41**, 3366-3370,  
352 doi:org/10.1016/j.jbiomech.2008.09.029 (2008).

354 15 Maganaris, C. N., Baltzopoulos, V. & Sargeant, A. J. Changes in achilles tendon moment arm  
from rest to maximum isometric plantarflexion: *In vivo* observations in man. *J Physiol* **510**,  
977–985 (1998).

356 16 Woledge, R. C., Curtin, N. A. & Homsher, E. Energetic aspects of muscle contraction. *Monogr*  
*Physiol Soc* **41**, 1-357 (1985).

358 17 Franz, J. R., Wierzbinski, C. M. & Kram, R. Metabolic cost of running barefoot versus shod: Is  
360 lighter better? *Med Sci Sports Exerc* **44**, 1519-1525, doi:10.1249/MSS.0b013e3182514a88.  
(2012).

362 18 Nigg, B. M. The role of impact forces and foot pronation: A new paradigm. *Clin J Sport Med*  
**11**, 2-9 (2001).
